# Supplementary material
Source: publisher figshare collection journal article supplement (https://asha.figshare.com/articles/dataset/_/21669647)
Supplement: Supplementary file 1 [file 1]

### Supplemental Material S3: COREQ Checklist

| Item                                          | Guide questions/description                                           | Location                  |
|-----------------------------------------------|-----------------------------------------------------------------------|---------------------------|
| Domain 1: Research team and reflexivity       |                                                                       |                           |
| 1. Interviewer/facilitator                    | Which author/s conducted the interview?                               | Page 4                    |
| 2. Credentials                                | What were the researcher's credentials?                               | Supplemental material S2  |
| 3. Occupation                                 | What was their occupation at the time of the study?                   | Supplemental material S2  |
| 4. Gender                                     | Was the researcher male or female?                                    | Supplemental material S2  |
| 5. Experience and training                    | What experience or training did the researcher have?                  | Supplemental material S2  |
| 6. Relationship with participants established | Was a relationship established prior to study commencement?           | Supplemental material S2  |
| 7. Participant knowledge of the interviewer   | What did the participants know about the researcher?                  | Supplemental material S2  |
| 8. Interviewer characteristics                | What characteristics were reported about the interviewer/facilitator? | Supplemental material S2  |
| Domain 2: Study design                        |                                                                       |                           |
| 9. Methodological orientation and theory      | What methodological orientation was stated to underpin the study?     | Page 4                    |
| 10. Sampling                                  | How were participants selected?                                       | Page 3                    |
| 11. Method of approach                        | How were participants approached?                                     | Page 3                    |
| 12. Sample size                               | How many participants were in the study?                              | Page 4                    |
| 13. Non-participation                         | How many people refused to participate or dropped out? Reasons?       | Page 4                    |
| 14. Setting of data collection                | Where was the data collected?                                         | Page 3                    |
| 15. Presence of non-participants              | Was anyone else present besides the participants and researchers?     | N/A                       |
| 16. Description of sample                     | What are the important characteristics of the sample?                 | Table 1, Table 2, Table 3 |
| 17. Interview guide                           | Were questions, prompts, guides provided by the authors?              | Appendix                  |
| 18. Repeat interviews                         | Were repeat interviews carried out?                                   | N/A                       |
| 19. Audio and visual recording                | Did the research use audio or visual recording to collect the data?   | Page 4                    |
| 20. Field notes                               | Were field notes made during and/or after the interview?              | Page 4                    |

|                                    |                                                                                                         |                                    |
|------------------------------------|---------------------------------------------------------------------------------------------------------|------------------------------------|
| 21. Duration                       | What was the duration of the interviews?                                                                | Page 4                             |
| 22. Data saturation                | Was data saturation discussed?                                                                          | Page 4                             |
| 23. Transcripts returned           | Were transcripts returned to participants for comment and/or correction?                                | Page 4                             |
| Domain 3: Analysis and findings    |                                                                                                         |                                    |
| 24. Number of data coders          | How many data coders coded the data?                                                                    | Page 4                             |
| 25. Description of the coding tree | Did authors provide a description of the coding tree?                                                   | Supplemental material S1, Table 4. |
| 26. Derivation of themes           | Were themes identified in advance or derived from the data?                                             | Page 4                             |
| 27. Software                       | What software, if applicable, was used to manage the data?                                              | Page 4                             |
| 28. Participant checking           | Did participants provide feedback on the findings?                                                      | Page 4                             |
| 29. Quotations presented           | Were participant quotations presented to illustrate the themes/findings? Was each quotation identified? | Pages 6-10                         |
| 30. Data and findings consistent   | Was there consistency between the data presented and the findings?                                      | Pages 6-10                         |
| 31. Clarity of major themes        | Were major themes clearly presented in the findings?                                                    | Pages 6-10, Table 4                |
| 32. Clarity of minor themes        | Is there a description of diverse cases or discussion of minor themes?                                  | Pages 6-10                         |

*Note.* The COREQ Checklist is from Tong, A., Sainsbury, P., & Craig, J. (2007). Consolidated criteria for reporting qualitative research (COREQ): A 32-item checklist for interviews and focus groups. *International Journal for Quality in Health Care*, 19(6), 349-357. <https://doi.org/10.1093/intqhc/mzm042>
