# Supplementary material
Source: publisher figshare collection journal article supplement (https://asha.figshare.com/articles/dataset/_/21669647)

## Supplemental Material S1: Example of a Coding Tree for Theme 2

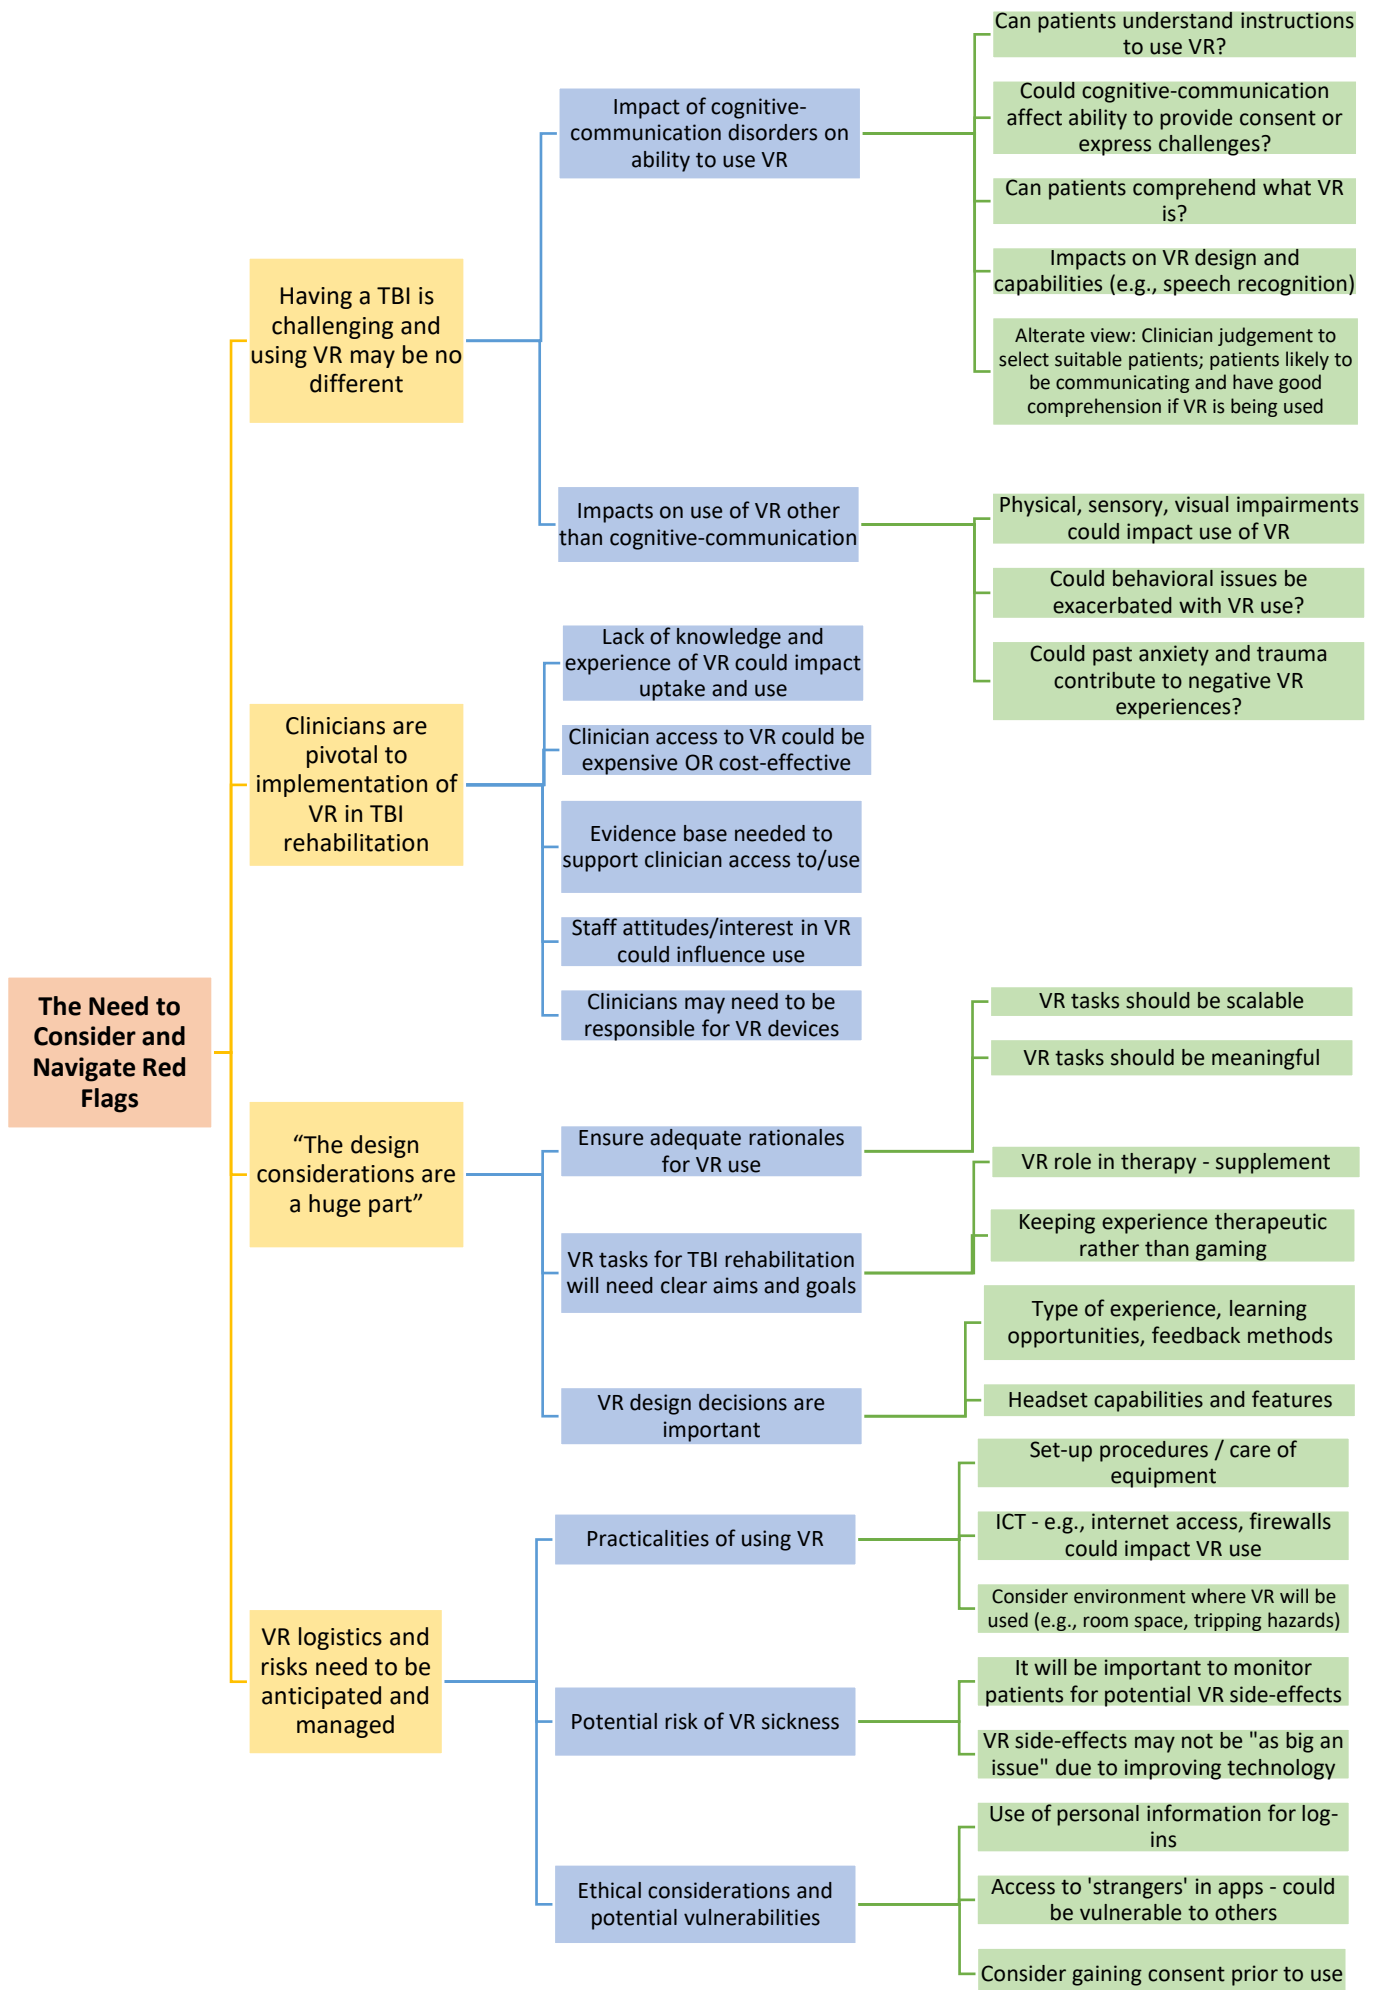

Supplement: Supplementary file 2 [file 1]
